# Supplementary material for: Tail Analysis Without Parametric Models: A Worst-Case Perspective
Source: Atypon-hosted journal article supplement (doi:10.1287/opre.2017.1643), 2017-09-25
Supplement: opre.2017.1643-sm.pdf [file opre.2017.1643-sm.pdf]

## Appendix

### EC.1. Proofs for Section 4

We need several results from convex analysis to prove Lemma 1. For any convex function  $g$  on  $\mathbb{R}$ , let  $\text{dom } g = \{x \in \mathbb{R} : g(x) < \infty\}$  be its effective domain. The following theorems are from Rockafellar (1997), specialized to convex functions  $g$  with  $\text{dom } g = \mathbb{R}$ . The definitions of a proper convex function and a closed convex function can be found on p.24 and p.52 therein respectively.

**THEOREM EC.1 (a.k.a. Rockafellar (1997), Corollary 10.1.1).** *A convex function finite on all of  $\mathbb{R}$  is necessarily continuous.*

**THEOREM EC.2 (a.k.a. Rockafellar (1997), Theorem 24.1).** *Let  $g$  be a closed proper convex function on  $\mathbb{R}$ , such that  $\text{dom } g = \mathbb{R}$ . Then  $g'_+$  exists and is a finite non-decreasing function on  $\mathbb{R}$ . Moreover,  $g'_+$  is right-continuous, i.e.,  $\lim_{z \searrow x} g'_+(z) = g'_+(x)$  for any  $x \in \mathbb{R}$ .*

**THEOREM EC.3 (a.k.a. Rockafellar (1997), Corollary 24.2.1).** *Let  $g$  be a finite convex function on a non-empty open real interval  $I$ . Then*

$$g(y) - g(x) = \int_x^y g'_+(t) dt$$

for any  $x$  and  $y$  in  $I$ .

**THEOREM EC.4 (a.k.a. Rockafellar (1997), Theorem 24.2).** *Let  $\varphi$  be a non-decreasing function from  $\mathbb{R}$  to  $[-\infty, \infty]$  such that  $\varphi(b)$  is finite for some  $b \in \mathbb{R}$ . Then the function given by*

$$g(x) = \int_b^x \varphi(t) dt$$

is a well-defined closed proper convex function on  $\mathbb{R}$ .

*Proof of Lemma 1.* Throughout this proof, without loss of generality let  $a = 0$  (by replacing  $f(x)$  with  $f(x + a)$ , and  $h(x)$  with  $h(x + a)$  respectively). Note that optimizations (1) and (2) do not depend on  $f(x)$  for  $x < 0$ . For the purpose of applying Theorems EC.1–EC.4 more directly,

let us extend  $f$  to  $\mathbb{R}^-$ , by defining  $f(x) = \eta - \nu x$  for  $x < 0$  (this extension of  $f$  is a mathematical artifact and does not necessarily match the given true density).

Let  $\mathcal{F}_1$  be the feasible region in (1), and  $\mathcal{F}_2$  be the feasible region in (2). We show that  $\mathcal{F}_1 = \mathcal{F}_2$ .

Proof of  $\mathcal{F}_1 \subset \mathcal{F}_2$ : Since  $f(x) < \infty$  for at least one  $x \in \mathbb{R}$  (e.g., take  $x = 0$ ) and  $f(x) \geq 0 > -\infty$  for all  $x \in \mathbb{R}$ , we get that  $f$  is proper (Rockafellar (1997), p.24).

Next, we argue that  $f(x) < \infty$  for all  $x \in \mathbb{R}$ . Suppose on the contrary that  $f(x_0) = \infty$  for some  $x_0 > 0$ . If  $f(y) < \infty$  for some  $y > x_0$ , then  $((y - x_0)/y)f(0) + (x_0/y)f(y) = ((y - x_0)/y)\eta + (x_0/y)f(y) < \infty = f(x_0)$ , contradicting (1d). But if  $f(y) = \infty$  for all  $y > x_0$ , then  $\int_0^\infty f(t)dt = \infty$ , contradicting (1a). Therefore,  $f(x) < \infty$  for all  $x \in \mathbb{R}$ , and with (1e), we conclude that  $f$  is finite.

Since  $f$  is finite on  $\mathbb{R}$ , Theorem EC.1 implies that  $f$  is continuous and hence lower semi-continuous. Since  $f$  is proper, lower semi-continuity is the same as closedness (Rockafellar (1997), p.52). Hence  $f$  is closed.

Therefore, together with the convexity condition in (1d), Theorem EC.2 implies the existence of  $f'_+$  that satisfies (2c). Moreover, Theorem EC.3 implies (2f).

Next, with the monotonicity of  $f'_+$  by (2c), we have  $f'_+(x) \geq f'_+(0) = -\nu$  for all  $x \geq 0$ , thus implying the first inequality of (2d). To prove the second inequality in (2d), suppose in the contrary that  $f'_+(x_0) > 0$  for some  $x_0 > 0$ . Since  $f'_+(x) \geq f'_+(x_0) > 0$  for all  $x > x_0$  by (2c), we have, from (2f),  $f(x) = \int_0^x f'_+(t)dt + \eta \rightarrow \infty$ , implying that  $\int_0^\infty f(x)dx = \infty$  and contradicting (1a). Hence the second inequality in (2d) holds. We have therefore shown (2d).

Lastly, suppose that  $f'_+(x) \not\rightarrow 0$ . Then, since (2d) holds, there exists a sequence  $x_k \rightarrow \infty$  such that  $f'_+(x_k) \rightarrow c < 0$ . But since  $f'_+$  is monotone by (2c),  $\lim_{x \rightarrow \infty} f'_+(x)$  exists and must equal  $c$ . But then, from (2f),  $f(x) = \int_0^x f'_+(t)dt + \eta \rightarrow -\infty$ , violating (1e). Thus (2e) holds.

The constraints (2a) and (2b) follow immediately from (1a) and (1b). We therefore conclude that  $\mathcal{F}_1 \subset \mathcal{F}_2$ .

Proof of  $\mathcal{F}_2 \subset \mathcal{F}_1$ : Since  $f'_+$  is bounded on  $\mathbb{R}$  by (2d), Theorem EC.4 and (2c) (with  $f'_+(x)$  defined as  $-\nu$  for  $x < 0$ ) implies that the  $f$  defined by (2f) is convex on  $\mathbb{R}$ , giving (1d).

Suppose  $f(x_0) < 0$  for some  $x_0 > 0$ . Then, since  $f'_+ \leq 0$  by (2d), (2f) implies  $f(x) < 0$  for all  $x \geq x_0$ . Thus  $\int_0^\infty f(x)dx = -\infty$ , contradicting (2a). Therefore, (1e) holds.

The constraint (2d) implies (1c) immediately. The condition (2f) implies  $f(0) = f(0+)$ . Thus, combining with (2b), we get that (1b) holds. Finally, note that (2a) is the same as (1a). We conclude that  $\mathcal{F}_2 \subset \mathcal{F}_1$ .  $\square$

To prove Theorem 2, we first introduce the following lemma:

LEMMA EC.1. *If  $f$  is a feasible solution of (1), equivalently (2), then  $xf(x) \rightarrow 0$  and  $x^2 f'_+(x) \rightarrow 0$  as  $x \rightarrow \infty$ .*

*Proof of Lemma EC.1.* We need the observations that  $f(x)$  is non-increasing by (2d),  $f(x) \geq 0$  for all  $x \geq a$  by (1e), and that  $f$  is integrable on  $[a, \infty)$  with  $\int_a^\infty f(x)dx = \beta$  by (1a). Denote  $F(x) = \int_a^x f(t)dt$  and  $g(x) = xf(x) - F(x)$ . Consider, for  $a \vee 0 \leq x_1 \leq x_2$ ,

$$\begin{aligned} g(x_2) - g(x_1) &= x_2 f(x_2) - x_1 f(x_1) - (F(x_2) - F(x_1)) \\ &\leq x_2 f(x_2) - x_1 f(x_1) - f(x_2)(x_2 - x_1) \quad \text{since } f(x) \text{ is non-increasing} \\ &= x_1 [f(x_2) - f(x_1)] \\ &\leq 0 \quad \text{again since } f \text{ is non-increasing} \end{aligned}$$

Therefore  $g$  is non-increasing for  $x \geq a \vee 0$ , and since  $xf(x) \geq 0$  and  $0 \leq F(x) \leq \beta$  for  $x \geq a \vee 0$ , we have  $g$  bounded from below on the same range. This implies that  $g$  must converge to a limit, say  $c$ , as  $x \rightarrow \infty$ . In other words,  $xf(x) - F(x) \rightarrow c$ , and since  $F(x) \rightarrow \beta$ , we have  $xf(x) \rightarrow c + \beta$ . Since  $xf(x) \geq 0$  for  $x \geq a \vee 0$ , there are two cases:  $c + \beta > 0$  or  $c + \beta = 0$ . The first case implies that  $xf(x) \geq \epsilon > 0$  for some  $\epsilon$  for all large enough  $x$ . This means  $f(x) \geq \epsilon/x$  for all large enough  $x$ , and hence  $\int_a^\infty f(x)dx = \infty$ , which contradicts (1a). Therefore  $xf(x)$  must converge to 0. This proves the first part of the lemma.

To prove the second part, we need the observation that  $f'_+(x)$  is non-decreasing for  $x \geq a$  by (2c), and is non-positive for  $x \geq a$  by (2d). Also, by (2f) we have  $f(x) = \int_a^x f'_+(t)dt + \eta$  for  $x \geq a$ . Let  $\bar{F}(x) = \int_x^\infty f(t)dt$  for  $x \geq a$ , which is finite and converges to 0 by (1a). We now define  $\tilde{g}(x) =$

$-x^2 f'_+(x) + 2\tilde{F}(x)$ , where  $\tilde{F}(x) = -\int_x^\infty t f'_+(t) dt$ , for  $x \geq a$ . Note that  $x f'_+(x)$  is integrable on  $[a, \infty)$  because the absolute continuity of  $f$ , and  $\lim_{x \rightarrow \infty} x f(x) \rightarrow 0$  as we have just proved, which allows integration by parts yielding

$$\tilde{F}(x) = -\int_x^\infty t f'_+(t) dt = -t f(t)|_x^\infty + \int_x^\infty f(t) dt = x f(x) + \bar{F}(x) < \infty \quad (\text{EC.1})$$

For any  $(a \vee 0) \leq x_1 \leq x_2$ ,

$$\begin{aligned} \tilde{g}(x_2) - \tilde{g}(x_1) &= x_1^2 f'_+(x_1) - x_2^2 f'_+(x_2) - 2\tilde{F}(x_1) + 2\tilde{F}(x_2) \\ &\leq x_1^2 f'_+(x_1) - x_2^2 f'_+(x_2) + f'_+(x_2)(x_2^2 - x_1^2) \quad \text{since } f'_+(x) \text{ is non-decreasing} \\ &= x_1^2 (f'_+(x_1) - f'_+(x_2)) \\ &\leq 0 \quad \text{again since } f'_+(x) \text{ is non-decreasing} \end{aligned}$$

Therefore,  $\tilde{g}(x)$  is non-increasing for  $x \geq a$ . Note that  $-x^2 f'_+(x) \geq 0$  for  $x \geq a$ . Also, from (EC.1), since  $\lim_{x \rightarrow \infty} x f(x) \rightarrow 0$  and  $\bar{F}(x) \rightarrow 0$ , we have  $\tilde{F}(x) \rightarrow 0$  as  $x \rightarrow \infty$  and hence also bounded for large enough  $x$ . Therefore  $\tilde{g}$  is bounded from below. This implies that  $\tilde{g}$  must converge to a limit, say  $\tilde{c}$ , as  $x \rightarrow \infty$ . Since  $\tilde{F}(x) \rightarrow 0$ , we have  $-x^2 f'_+(x) \rightarrow \tilde{c}$ . Since  $-x^2 f'_+(x) \geq 0$  for  $x \geq a$ , there are two cases: either  $\tilde{c} > 0$  or  $\tilde{c} = 0$ . The former case implies that  $-x f'_+(x) \geq \epsilon/x$  for some  $\epsilon > 0$  and large enough  $x$ , and so  $\tilde{F}(x) = -\int_x^\infty x f'_+(x) dx = \infty$  for  $x \geq a$ , which contradicts (EC.1). Therefore  $-x^2 f'_+(x) \rightarrow 0$ . This proves the second part of the lemma.  $\square$

*Proof of Theorem 2.* Throughout this proof, without loss of generality let  $a = 0$ . By Lemma EC.1, we can introduce the extra conditions  $x f(x) \rightarrow 0$  and  $x^2 f'_+(x) \rightarrow 0$  as  $x \rightarrow \infty$  into formulation (2). In other words, formulation (2) is equivalent to (letting  $a = 0$ )

$$\begin{aligned} \max_f \quad & \int_0^\infty h(x) f(x) dx \\ \text{subject to} \quad & \int_0^\infty f(x) dx = \beta \end{aligned} \quad (\text{EC.2a})$$

$$f(0) = \eta \quad (\text{EC.2b})$$

$$f'_+(x) \text{ exists and is non-decreasing and right-continuous for } x \geq 0 \quad (\text{EC.2c})$$

$$-\nu \leq f'_+(x) \leq 0 \text{ for } x \geq 0 \quad (\text{EC.2d})$$

$$f'_+(x) \rightarrow 0 \text{ as } x \rightarrow \infty \quad (\text{EC.2e})$$

$$f(x) = \int_0^x f'_+(t)dt + \eta \text{ for } x \geq 0 \quad (\text{EC.2f})$$

$$xf(x) \rightarrow 0 \text{ and } x^2 f'_+(x) \rightarrow 0 \text{ as } x \rightarrow \infty \quad (\text{EC.2g})$$

For convenience, we let  $\tilde{H}(x) = \int_0^x h(u)du$  and  $H(x) = \int_0^x \tilde{H}(u)du$ . Consider the objective function of (EC.2). Since  $\tilde{H}$  is continuous and  $f$  is absolutely continuous with  $f(x) = \int_0^x f'_+(t)dt + \eta$  by (EC.2f), we have, using integration by parts,

$$\int_0^\infty h(x)f(x)dx = \tilde{H}(x)f(x)\Big|_0^\infty - \int_0^\infty \tilde{H}(x)f'_+(x)dx = - \int_0^\infty \tilde{H}(x)f'_+(x)dx \quad (\text{EC.3})$$

where the second equality follows from (EC.2g) and that  $\tilde{H}(x) = O(x)$  as  $x \rightarrow \infty$  since  $h$  is bounded. As  $H$  is continuous and  $f'_+$  has bounded variation by (EC.2d) and (EC.2c), we have, using integration by parts again, that (EC.3) is equal to

$$-H(x)f'_+(x)\Big|_0^\infty + \int_0^\infty H(x)df'_+(x) = \int_0^\infty H(x)df'_+(x) \quad (\text{EC.4})$$

where the equality follows from (EC.2g) and that  $H(x) = O(x^2)$  as  $x \rightarrow \infty$  since  $h$  is bounded.

For (EC.2a), we can write

$$\int_0^\infty f(x)dx = \int_0^\infty \frac{x^2}{2}df'_+(x) \quad (\text{EC.5})$$

by merely viewing  $h \equiv 1$  in (EC.3) and (EC.4). Also, since  $f(x) \rightarrow 0$  as  $x \rightarrow \infty$  by (EC.2g), we can use integration by parts again to write

$$f(0) = - \int_0^\infty f'_+(x)dx = -xf'_+(x)\Big|_0^\infty + \int_0^\infty xdf'_+(x) = \int_0^\infty xdf'_+(x) \quad (\text{EC.6})$$

where the third equality follows from (EC.2g) again. Therefore, (EC.2) can be written as

$$\begin{aligned} \max_f \quad & \int_0^\infty H(x)df'_+(x) \\ \text{subject to} \quad & \int_0^\infty \frac{x^2}{2}df'_+(x) = \beta \end{aligned} \quad (\text{EC.7a})$$

$$\int_0^\infty xdf'_+(x) = \eta \quad (\text{EC.7b})$$

$$f'_+(x) \text{ exists and is non-decreasing and right-continuous for } x \geq 0 \quad (\text{EC.7c})$$

$$-\nu \leq f'_+(x) \leq 0 \text{ for } x \geq 0 \quad (\text{EC.7d})$$

$$f'_+(x) \rightarrow 0 \text{ as } x \rightarrow \infty \quad (\text{EC.7e})$$

$$f(x) = \int_0^x f'_+(t)dt + \eta \text{ for } x \geq 0 \quad (\text{EC.7f})$$

$$xf(x) \rightarrow 0 \text{ and } x^2 f'_+(x) \rightarrow 0 \text{ as } x \rightarrow \infty \quad (\text{EC.7g})$$

We show that (EC.7g) is redundant. By (EC.7a), we have  $\int_0^\infty (x^2/2)df'_+(x) < \infty$  and hence  $\int_x^\infty (t^2/2)df'_+(t) \rightarrow 0$  as  $x \rightarrow \infty$ . Now, for  $x \geq 0$ , we have

$$\int_x^\infty \frac{t^2}{2}df'_+(t) \geq \frac{x^2}{2} \int_x^\infty df'_+(t) = -\frac{x^2}{2}f'_+(x) \geq 0$$

where the first inequality follows since  $f'_+(x)$  is non-decreasing by (EC.7c), the equality follows from (EC.7e), and the last inequality from (EC.7d). Therefore,  $-(x^2/2)f'_+(x) \rightarrow 0$  as  $x \rightarrow \infty$ . This shows that the second part of (EC.7g) is redundant.

By (EC.7b), and since  $f'_+(x)$  is monotone, we can use integration by parts to get

$$\eta = \int_0^\infty xdf'_+(x) = xf'_+(x)\Big|_0^\infty - \int_0^\infty f'_+(x)dx = -\int_0^\infty f'_+(x)dx \quad (\text{EC.8})$$

where the last equality follows since we have proved  $-(x^2/2)f'_+(x) \rightarrow 0$  and so  $xf'_+(x) \rightarrow 0$  as  $x \rightarrow \infty$ . Now, using (EC.7f) and (EC.8), we write

$$f(x) = \int_0^x f'_+(t)dt + \eta = \int_0^x f'_+(t)dt - \int_0^\infty f'_+(t)dt = -\int_x^\infty f'_+(t)dt \quad (\text{EC.9})$$

Since  $-(x^2/2)f'_+(x) \rightarrow 0$  as  $x \rightarrow \infty$ , we have  $f'_+(x) = o(1/x^2)$ . So  $-\int_x^\infty f'_+(t)dt = o(1/x)$ . Then (EC.9) implies the first part of (EC.7g) is redundant.

Therefore, (EC.7) can be written as

$$\begin{aligned} \max_f \quad & \int_0^\infty H(x)df'_+(x) \\ \text{subject to} \quad & \int_0^\infty \frac{x^2}{2}df'_+(x) = \beta \\ & \int_0^\infty xdf'_+(x) = \eta \\ & f'_+(x) \text{ exists and is non-decreasing and right-continuous for } x \geq 0 \\ & -\nu \leq f'_+(x) \leq 0 \text{ for } x \geq 0 \\ & f'_+(x) \rightarrow 0 \text{ as } x \rightarrow \infty \end{aligned} \quad (\text{EC.10})$$

and the constraint (EC.7f) in (EC.2) states that  $f$  can be recovered from  $f(x) = \int_0^x f'_+(t)dt + \eta$ . Note that this definition of  $f$  must necessarily have a right derivative coinciding with the obtained  $f'_+(x)$ .

Finally, let  $p(x) = f'_+(x)/\nu + 1$ . Then (EC.10) can be rewritten as

$$\begin{aligned}
& \max_p && \nu \int_0^\infty H(x)dp(x) \\
& \text{subject to} && \int_0^\infty x^2 dp(x) = \frac{2\beta}{\nu} \\
& && \int_0^\infty x dp(x) = \frac{\eta}{\nu} \\
& && p(x) \text{ non-decreasing and right-continuous for } x \geq 0 \\
& && 0 \leq p(x) \leq 1 \text{ for } x \geq 0 \\
& && p(x) \rightarrow 1 \text{ as } x \rightarrow \infty
\end{aligned} \tag{EC.11}$$

or equivalently

$$\begin{aligned}
& \max_p && \nu \int_{-\infty}^\infty H(x)dp(x) \\
& \text{subject to} && \int_{-\infty}^\infty x^2 dp(x) = \frac{2\beta}{\nu} \\
& && \int_{-\infty}^\infty x dp(x) = \frac{\eta}{\nu} \\
& && p(x) \text{ non-decreasing and right-continuous for } x \in \mathbb{R} \\
& && 0 \leq p(x) \leq 1 \text{ for } x \in \mathbb{R} \\
& && p(x) \rightarrow 1 \text{ as } x \rightarrow \infty \\
& && p(x) = 0 \text{ for } x < 0
\end{aligned} \tag{EC.12}$$

since  $H(x) = x = x^2 = 0$  at  $x = 0$ . One can uniquely identify, up to measure zero, a non-decreasing, right-continuous  $p$  such that  $\lim_{x \rightarrow \infty} p(x) = 1$  and  $p(x) = 0$  for  $x < 0$  with a probability measure supported on  $\mathbb{R}^+$ . Hence (EC.12) is equivalent to (5). This concludes the result.  $\square$

To prove Theorem 3, we need several results from Winkler (1988) stated below.

**THEOREM EC.5 (Winkler (1988) Theorem 2.1(b)).** *Let  $\mathcal{X}$  be a measurable space with  $\sigma$ -field  $\mathcal{F}$  and suppose that  $\mathcal{P}$  is a simplex of probability measures whose extreme points are Dirac measures. Fix measurable functions  $f_1, \dots, f_n$  and real numbers  $c_1, \dots, c_n$ . Consider the set*

$$\mathcal{H} = \left\{ q \in \mathcal{P} : f_i \text{ is } q\text{-integrable and } \int f_i dq = c_i, 1 \leq i \leq n \right\}$$

Then  $\mathcal{H}$  is convex and

$$\text{ex } \mathcal{H} = \left\{ q \in \mathcal{H} : q = \sum_{i=1}^m t_i \cdot \delta(x_i), t_i > 0, \sum_{i=1}^m t_i = 1, x_i \in \mathcal{X}, 1 \leq m \leq n+1, \right. \\ \left. \text{the vectors } (f_1(x_i), \dots, f_n(x_i), 1), 1 \leq i \leq m, \text{ are linearly independent} \right\}$$

where  $\text{ex } \mathcal{H}$  denotes the set of all extreme points of  $\mathcal{H}$ .

**THEOREM EC.6 (Adapted from Winkler (1988) Theorem 3.2).** *Let  $\mathcal{X}$  be a Hausdorff space,  $\mathcal{F}$  be the Borel  $\sigma$ -field and  $\mathcal{P}_r(\mathcal{X})$  be the set of regular probability measures on  $\mathcal{X}$ . Let*

$$\mathcal{H} = \left\{ q \in \mathcal{P}_r(\mathcal{X}) : f_i \text{ is } q\text{-integrable and } \int f_i dq = c_i, 1 \leq i \leq n \right\}$$

Every measure affine functional  $J$  on  $\mathcal{H}$  fulfills

$$\sup\{J(q) : q \in \mathcal{H}\} = \sup\{J(q) : q \in \text{ex } \mathcal{H}\}$$

Theorem EC.6 is precisely Theorem 3.2 in Winkler (1988), except replacing the inequalities with equalities for the moments that define  $\mathcal{H}$ , which is immediate (and is pointed out by the comment right after the theorem in Winkler (1988)).

**PROPOSITION EC.1 (Winkler (1988) Proposition 3.1).** *Let  $\mathcal{X}$ ,  $\mathcal{F}$  and  $\mathcal{H}$  be given as in Theorem EC.6 and the function  $g$  on  $\mathcal{X}$  be integrable for every  $q \in \mathcal{H}$  (possibly with integral values  $\infty$  or  $-\infty$ ). Then the functional  $G$  on  $\mathcal{H}$  defined by  $G(q) = \int_{\mathcal{X}} g dq$  is measure affine.*

*Proof of Theorem 3.* By Examples 2.1(a) in Winkler (1988), the set  $\mathcal{P}$  in Theorem EC.5 can be chosen to be the set of all regular probability measures. On Polish space every probability measure is regular. Therefore, on the space  $\mathbb{R}^+$ , which is Polish, we can take  $\mathcal{P}$  in Theorem EC.5 as the set of all probability measures. The  $\mathcal{H}$  in Theorems EC.5 and EC.6 then coincide. By Proposition EC.1, the objective  $\nu\mathbb{E}[H(X)]$  in  $OPT(\mathcal{P}^+)$  is measure affine. Therefore, using Theorems EC.5 and EC.6, and noting that

$$\mathcal{H} \supseteq \left\{ q \in \mathcal{H} : q = \sum_{i=1}^m t_i \cdot \delta(x_i), t_i > 0, \sum_{i=1}^m t_i = 1, x_i \in \mathcal{X}, 1 \leq m \leq n+1 \right\} \supseteq \text{ex } \mathcal{H}$$

for the coincided  $\mathcal{H}$  in Theorems EC.5 and EC.6, we conclude the theorem.  $\square$

*Proof of Proposition 1.* If program (5) is consistent, then by Theorem 3, either an optimal solution in  $\mathcal{P}_3^+$  exists, which corresponds to the first case of the lemma, or there exists a feasible sequence  $\mathbb{P}^{(k)} \in \mathcal{P}_3^+$  such that  $Z(\mathbb{P}^{(k)}) \rightarrow Z^*$ . Let  $\mathbb{P}^{(k)} \sim (x_1^{(k)}, x_2^{(k)}, x_3^{(k)}, p_1^{(k)}, p_2^{(k)}, p_3^{(k)})$ . Suppose that  $x_i$ 's are all bounded above by a number, say  $M$ . Then, since  $[0, M]^3 \times \mathcal{S}_3$  is a compact set, by Bolzano-Weierstrass Theorem we must have a subsequence of  $(x_1^{(k)}, x_2^{(k)}, x_3^{(k)}, p_1^{(k)}, p_2^{(k)}, p_3^{(k)})$ , say  $(x_1^{(k_j)}, x_2^{(k_j)}, x_3^{(k_j)}, p_1^{(k_j)}, p_2^{(k_j)}, p_3^{(k_j)})$  converge to  $(x_1^*, x_2^*, x_3^*, p_1^*, p_2^*, p_3^*)$  in  $[0, M]^3 \times \mathcal{S}_3$ . Since  $H(x)$  is continuous by construction, we have  $Z(\mathbb{P}^{(k_j)}) = \nu \sum_{i=1}^3 H(x_i^{(k_j)}) p_i^{(k_j)} \rightarrow \nu \sum_{i=1}^3 H(x_i^*) p_i^* = Z(\mathbb{P}^*)$ , where  $\mathbb{P}^* \sim (x_1^*, x_2^*, x_3^*, p_1^*, p_2^*, p_3^*)$ . As  $Z(\mathbb{P}^{(k_j)})$  is a subsequence of  $Z(\mathbb{P}^{(k)})$ ,  $Z(\mathbb{P}^*)$  must be equal to  $Z^*$ , and so  $\mathbb{P}^*$  is an optimal solution, which reduces to the first case in the lemma. Therefore, for the second case, we should focus on the scenario that at least one  $x_i^{(k)}$  satisfies  $\limsup_{k \rightarrow \infty} x_i^{(k)} = \infty$ .

Without loss of generality, we fix the convention that  $x_1^{(k)} \leq x_2^{(k)} \leq x_3^{(k)}$ . If at least one of  $x_i^{(k)}$  satisfies  $\limsup_{k \rightarrow \infty} x_i^{(k)} = \infty$ , we must have  $\limsup_{k \rightarrow \infty} x_3^{(k)} = \infty$ . In order that  $\mathbb{P}^{(k)}$  is feasible,  $\mathbb{E}^{(k)}[X] = \mu$  holds and so  $x_1^{(k)} \leq \mu$  for all  $k$ . We now distinguish two cases: either  $x_2^{(k)}$  is uniformly bounded, say by a large number  $M \geq \mu$ , or  $\limsup_{k \rightarrow \infty} x_2^{(k)} = \infty$  also. Consider the first case. First, we find a subsequence  $x_3^{(k_j)} \nearrow \infty$ . Since  $(x_1^{(k_j)}, x_2^{(k_j)}) \in [0, M]^2$  which is compact, we can choose a further subsequence  $k_{j'}$  such that  $(x_1^{(k_{j'})}, x_2^{(k_{j'})}, x_3^{(k_{j'})}) \rightarrow (x_1^*, x_2^*, \infty)$  where  $(x_1^*, x_2^*) \in [0, M]^2$ . Now, since  $(p_1^{(k_{j'})}, p_2^{(k_{j'})}, p_3^{(k_{j'})}) \in \mathcal{S}_3$  which is also compact, we can choose another further subsequence  $k_{j''}$  such that  $(p_1^{(k_{j''})}, p_2^{(k_{j''})}, p_3^{(k_{j''})}) \rightarrow (p_1^*, p_2^*, p_3^*) \in \mathcal{S}_3$ . Note that by the constraint  $\mathbb{E}^{(k)}[X^2] = p_1^{(k_{j''})} x_1^{(k_{j''})^2} + p_2^{(k_{j''})} x_2^{(k_{j''})^2} + p_3^{(k_{j''})} x_3^{(k_{j''})^2} = \sigma$ , we must have  $p_3^{(k_{j''})} = (\sigma - p_1^{(k_{j''})} x_1^{(k_{j''})^2} - p_2^{(k_{j''})} x_2^{(k_{j''})^2}) / x_3^{(k_{j''})^2} \leq \sigma / x_3^{(k_{j''})^2} \rightarrow 0$ . In conclusion, in this case, we end up being able to find a sequence of measures  $\mathbb{P}^{(k)'} \sim (x_1^{(k)'}, x_2^{(k)'}, x_3^{(k)'}, p_1^{(k)'}, p_2^{(k)'}, p_3^{(k)'})$  with  $(x_1^{(k)'}, x_2^{(k)'}, x_3^{(k)'}, p_1^{(k)'}, p_2^{(k)'}, p_3^{(k)'}) \rightarrow (x_1^*, x_2^*, \infty, p_1^*, p_2^*, 0)$  where  $x_1^*, x_2^* \in \mathbb{R}^+$  and  $(p_1^*, p_2^*) \in \mathcal{S}_2$ .

For the second case, namely when  $\limsup_{k \rightarrow \infty} x_i^{(k)} = \infty$  for both  $i = 2$  and  $3$ . We can argue similarly that there is a sequence of measures  $\mathbb{P}^{(k)'} \sim (x_1^{(k)'}, x_2^{(k)'}, x_3^{(k)'}, p_1^{(k)'}, p_2^{(k)'}, p_3^{(k)'})$ , such that  $x_2^{(k)'}, x_3^{(k)'} \rightarrow \infty$  and  $p_2^{(k)'}, p_3^{(k)'} \rightarrow 0$ . In other words,  $(x_1^{(k)'}, x_2^{(k)'}, x_3^{(k)'}, p_1^{(k)'}, p_2^{(k)'}, p_3^{(k)'}) \rightarrow (x_1^*, \infty, \infty, 1, 0, 0)$  where  $x_1^* \in \mathbb{R}^+$ .  $\square$

*Proof of Lemma 2.* It follows from Jensen's inequality that for any  $\mathbb{P} \in \mathcal{P}^+$ ,  $\mathbb{E}[X^2] \geq \mathbb{E}[X]^2$ , which gives  $\sigma \geq \mu^2$  in (5). On the other hand, if  $\sigma \geq \mu^2$ , it is also rudimentary to find  $\mathbb{P} \in \mathcal{P}_2^+$  with  $\mathbb{E}[X] = \mu$  and  $\mathbb{E}[X^2] = \sigma$ . Substituting  $\mu = \eta/\nu$  and  $\sigma = 2\beta/\nu$ , we get  $\eta^2 \leq 2\beta\nu$ . Lastly,  $\mathbb{E}[X^2] = \mathbb{E}[X]^2$  if and only if  $\mathbb{P}$  is a point mass. The equivalent statements regarding program (1) follows from Theorem 2.  $\square$

*Proof of Proposition 2.* Consider a sequence  $f^{(k)}(x), x \geq a$  given by

$$f^{(k)}(x) = \begin{cases} \eta - \nu(x - a) & \text{for } a \leq x \leq x_1^{(k)} + a \\ \eta - \nu x_1^{(k)} - \nu p_2^{(k)}(x - a - x_1^{(k)}) & \text{for } x_1^{(k)} + a \leq x \leq x_2^{(k)} + a \\ 0 & \text{for } x_2^{(k)} + a \leq x \end{cases}$$

where

$$\begin{aligned} x_1^{(k)} &= \mu - \gamma^{(k)} \text{ and } \gamma^{(k)} = \frac{\sigma - \mu^2}{x_2^{(k)} - \mu} \\ x_2^{(k)} &\rightarrow \infty \\ p_1^{(k)} &= 1 - p_2^{(k)} \\ p_2^{(k)} &= \frac{\sigma - \mu^2}{x_2^{(k)2} - 2\mu x_2^{(k)} + \sigma} \end{aligned} \tag{EC.13}$$

and  $\mu, \sigma$  are defined in (4).

We claim that  $f^{(k)}$  is feasible for (1) for large enough  $k$ . This can be argued by verifying that  $(x_1^{(k)}, x_2^{(k)}, p_1^{(k)}, p_2^{(k)}) \in \mathcal{P}_2^+$  is feasible for (5) and invoking the one-to-one correspondence between the feasible solutions in (1) and (5) depicted in Theorem 2. Here we provide an alternate direct verification. It is obvious that for large enough  $x_2^{(k)}$ ,  $f^{(k)}$  is non-negative and convex. Moreover,  $f^{(k)}(a) = f^{(k)}(a+) = \eta$  and  $f_+^{(k)'}(a) \geq -\nu$ . To show  $\int_a^\infty f(x)dx = \beta$ , we first verify that

$$p_1^{(k)} x_1^{(k)} + p_2^{(k)} x_2^{(k)} = \mu \tag{EC.14}$$

and

$$p_1^{(k)} x_1^{(k)2} + p_2^{(k)} x_2^{(k)2} = \sigma \tag{EC.15}$$

for large  $k$ . In fact, we will do so by showing that  $\gamma^{(k)}$  and  $p_2^{(k)}$  displayed in (EC.13) are the unique choices that satisfy (EC.14) and (EC.15) and also  $x_1^{(k)} = \mu - \gamma^{(k)}$  and  $p_1^{(k)} = 1 - p_2^{(k)}$ . With the latter conditions, (EC.14) and (EC.15) can be written as

$$(1 - p_2^{(k)})(\mu - \gamma^{(k)}) + p_2^{(k)} x_2^{(k)} = \mu$$

and

$$(1 - p_2^{(k)})(\mu - \gamma^{(k)})^2 + p_2^{(k)} x_2^{(k)^2} = \sigma$$

respectively, which further gives

$$p_2^{(k)} (\gamma^{(k)} + x_2^{(k)} - \mu) - \gamma^{(k)} = 0 \quad (\text{EC.16})$$

and

$$p_2^{(k)} (x_2^{(k)^2} - (\mu - \gamma^{(k)})^2) + (\mu - \gamma^{(k)})^2 = \sigma \quad (\text{EC.17})$$

From (EC.16) we have

$$p_2^{(k)} = \frac{\gamma^{(k)}}{\gamma^{(k)} + x_2^{(k)} - \mu} \quad (\text{EC.18})$$

Putting (EC.18) into (EC.17), we get

$$\frac{\gamma^{(k)}}{\gamma^{(k)} + x_2^{(k)} - \mu} (x_2^{(k)^2} - (\mu - \gamma^{(k)})^2) + (\mu - \gamma^{(k)})^2 = \sigma$$

which can be simplified to

$$\gamma^{(k)} (x_2^{(k)} + \mu - \gamma^{(k)}) + (\mu - \gamma^{(k)})^2 = \sigma$$

giving

$$\gamma^{(k)} = \frac{\sigma - \mu^2}{x_2^{(k)} - \mu} \quad (\text{EC.19})$$

Plugging (EC.19) into (EC.18), we have

$$p_2^{(k)} = \frac{\sigma - \mu^2}{(\sigma - \mu^2) + (x_2^{(k)} - \mu)^2} \quad (\text{EC.20})$$

thus recovering  $\gamma^{(k)}$  and  $p_2^{(k)}$  in (EC.13).

Therefore,

$$\begin{aligned} \int_a^\infty f^{(k)}(x) dx &= \int_a^{x_1^{(k)}+a} [\eta - \nu(x-a)] dx + \int_{x_1^{(k)}+a}^{x_2^{(k)}+a} [\eta - \nu x_1^{(k)} - \nu p_2^{(k)}(x-a-x_1^{(k)})] dx \\ &= \eta x_2^{(k)} - \frac{\nu}{2} x_1^{(k)^2} - \nu x_1^{(k)}(x_2^{(k)} - x_1^{(k)}) - \frac{\nu p_2^{(k)}}{2} (x_2^{(k)} - x_1^{(k)})^2 \\ &= \eta x_2^{(k)} + \frac{\nu p_1^{(k)}}{2} x_1^{(k)^2} + \frac{\nu p_2^{(k)}}{2} x_2^{(k)^2} - \nu p_1^{(k)} x_1^{(k)} x_2^{(k)} - \nu p_2^{(k)} x_2^{(k)^2} \text{ using } p_1^{(k)} = 1 - p_2^{(k)} \\ &= \eta x_2^{(k)} + \frac{\nu \sigma}{2} - \nu x_2^{(k)} \mu \text{ using (EC.14) and (EC.15)} \\ &= \beta \text{ using } \eta - \nu \mu = 0 \text{ and } \beta = \nu \sigma / 2 \end{aligned}$$

Hence  $f^{(k)}$  is feasible for (1) for large enough  $k$ .

Now, the objective value evaluated at  $f^{(k)}$  is

$$\int_a^{x_1^{(k)}+a} h(x)(\eta - \nu(x-a))dx + \int_{x_1^{(k)}+a}^{x_2^{(k)}+a} h(x)(\eta - \nu x_1^{(k)} - \nu p_2^{(k)}(x-a-x_1^{(k)}))dx \quad (\text{EC.21})$$

The first term in (EC.21) is bounded since  $x_1^{(k)} \rightarrow \mu$ . We focus on the second term. By the assumption, we can find  $C > 0$  such that  $h(x) \geq Cx^\epsilon$  for all  $x \geq a$ . Then, for large enough  $k$ ,

$$\begin{aligned} & \int_{x_1^{(k)}+a}^{x_2^{(k)}+a} h(x)(\eta - \nu x_1^{(k)} - \nu p_2^{(k)}(x-a-x_1^{(k)}))dx \\ & \geq C \int_{x_1^{(k)}+a}^{x_2^{(k)}+a} x^\epsilon (\eta - \nu x_1^{(k)} - \nu p_2^{(k)}(x-a-x_1^{(k)}))dx \\ & \geq C \int_{x_1^{(k)}+a}^{x_2^{(k)}+a} [(\eta - \nu p_1^{(k)} x_1^{(k)} + \nu p_2^{(k)} a)x^\epsilon - \nu p_2^{(k)} x^{\epsilon+1}]dx \\ & = (\eta - \nu p_1^{(k)} x_1^{(k)} + \nu p_2^{(k)} a) \frac{x^{\epsilon+1}}{\epsilon+1} \Big|_{x_1^{(k)}+a}^{x_2^{(k)}+a} - \nu p_2^{(k)} \frac{x^{\epsilon+2}}{\epsilon+2} \Big|_{x_1^{(k)}+a}^{x_2^{(k)}+a} \\ & = (\eta - \nu p_1^{(k)} x_1^{(k)} + \nu p_2^{(k)} a) \frac{(x_2^{(k)}+a)^{\epsilon+1}}{\epsilon+1} - (\eta - \nu p_1^{(k)} x_1^{(k)} + \nu p_2^{(k)} a) \frac{(x_1^{(k)}+a)^{\epsilon+1}}{\epsilon+1} \\ & \quad - \nu p_2^{(k)} \frac{(x_2^{(k)}+a)^{\epsilon+2}}{\epsilon+2} + \nu p_2^{(k)} \frac{(x_1^{(k)}+a)^{\epsilon+2}}{\epsilon+2} \end{aligned} \quad (\text{EC.22})$$

Note that since  $p_1^{(k)} \rightarrow 1$ ,  $x_1^{(k)} \rightarrow \mu$ ,  $p_2^{(k)} \rightarrow 0$  and  $\eta - \nu\mu = 0$ , the second term in (EC.22) converges to 0. Moreover, since  $p_2^{(k)} \rightarrow 0$ , the fourth term also converges to 0. Consider the first term in (EC.22).

In particular,

$$\begin{aligned} \eta - \nu p_1^{(k)} x_1^{(k)} + \nu p_2^{(k)} a &= \eta - \nu(1-p_2^{(k)})(\mu - \gamma^{(k)}) + \nu p_2^{(k)} a \\ &= p_1^{(k)} \nu \gamma^{(k)} + \nu p_2^{(k)} (\mu + a) \end{aligned}$$

by using  $\eta - \nu\mu = 0$  and  $p_1^{(k)} = 1 - p_2^{(k)}$ . Substituting  $\gamma^{(k)} = (\sigma - \mu^2)/(x_2^{(k)} - \mu)$  and  $p_2^{(k)} = \Theta(1/x_2^{(k)2})$ ,

and using  $p_1^{(k)} \rightarrow 1$ , we have

$$(\eta - \nu p_1^{(k)} x_1^{(k)} + \nu p_2^{(k)} a) \frac{(x_2^{(k)}+a)^{\epsilon+1}}{\epsilon+1} = (p_1^{(k)} \nu \gamma^{(k)} + \nu p_2^{(k)} (\mu + a)) \frac{(x_2^{(k)}+a)^{\epsilon+1}}{\epsilon+1} = \frac{\nu(\sigma - \mu^2)x_2^{(k)\epsilon}}{\epsilon+1} (1 + o(1))$$

On the other hand, for the third term in (EC.22), substituting  $p_2^{(k)} = (\sigma - \mu^2)/(x_2^{(k)2} - 2\mu x_2^{(k)} + \sigma)$ ,

we have

$$-\nu p_2^{(k)} \frac{(x_2^{(k)}+a)^{\epsilon+2}}{\epsilon+2} = -\frac{\nu(\sigma - \mu^2)x_2^{(k)\epsilon}}{\epsilon+2} (1 + o(1))$$

Thus, (EC.22) is equal to

$$\left( \frac{1}{\epsilon+1} - \frac{1}{\epsilon+2} \right) \nu(\sigma - \mu^2) x_2^{(k)\epsilon} (1 + o(1)) \rightarrow \infty$$

and hence the optimal value of (1) is  $\infty$ .  $\square$

## EC.2. Proofs for Section 5

To prove Proposition 3, we borrow the following result:

LEMMA EC.2 (Adapted from Theorem 5.1 in Birge and Dulá (1991)). *Consider*

$OPT(\mathcal{P}[0, \tilde{c}])$  for any  $0 < \tilde{c} < \infty$ . Suppose  $H$  is convex with derivative  $H'$  convex on  $(0, c)$  and concave on  $(c, \tilde{c})$  for some  $0 \leq c \leq \tilde{c}$ . If  $OPT(\mathcal{P}[0, \tilde{c}])$  is consistent, then an optimal solution exists and lies in  $\mathcal{P}_2[0, \tilde{c}]$ .

This lemma follows from Theorem 5.1 in Birge and Dulá (1991) that applies to the associated dual problem.

*Proof of Proposition 3.* By Theorem 3,  $OPT(\mathcal{P}^+)$  has the same optimal value as  $OPT(\mathcal{P}_3^+)$ . By Lemma EC.2, for every  $\mathbb{P}$  feasible for  $OPT(\mathcal{P}_3^+)$ , which necessarily has bounded support say on  $[0, M]$  for some  $M > 0$ , there exists  $\mathbb{P}' \in \mathcal{P}_2[0, M]$  with the same first and second moments such that  $Z(\mathbb{P}') \geq Z(\mathbb{P})$ . Since  $\mathcal{P}_2^+ \subset \mathcal{P}_3^+$ , this implies that  $OPT(\mathcal{P}_3^+)$  has the same optimal value as  $OPT(\mathcal{P}_2^+)$ , which concludes the proposition.  $\square$

*Proof of Proposition 4. Proof of 1:* Let the optimal probability measure in  $\mathcal{P}_2^+$  be represented by  $(x_1, x_2, p_1, p_2)$ . Note that  $x_1 \neq x_2$  since otherwise  $\sigma = \mu^2$ . Adopting a similar line of analysis as in Birge and Dulá (1991), we let  $x_1 < x_2$  without loss of generality. For a two-support-point distribution to be feasible, we must have  $x_1 < \mu$ . Feasibility also enforces that  $p_1 x_1 + p_2 x_2 = \mu$ ,  $p_1 x_1^2 + p_2 x_2^2 = \sigma$  and  $p_1 + p_2 = 1$ . Hence  $p_2 = 1 - p_1$ , which gives  $p_1 x_1 + (1 - p_1) x_2 = \mu$  and  $p_1 x_1^2 + (1 - p_1) x_2^2 = \sigma$ . From the first equation we get  $p_1 = (x_2 - \mu)/(x_2 - x_1)$ . Putting this into  $p_1 x_1^2 + (1 - p_1) x_2^2 = \sigma$ , we further get  $x_2 = (\sigma - \mu x_1)/(\mu - x_1)$ . Now, putting this in turn into  $p_1 = (x_2 - \mu)/(x_2 - x_1)$ , we obtain  $p_1 = (\sigma - \mu^2)/(\sigma - 2\mu x_1 + x_1^2)$  and hence  $p_2 = 1 - p_1 = (\mu - x_1)^2/(\sigma - 2\mu x_1 + x_1^2)$ . Therefore,  $Z^*$  is given by

$$\max_{x_1 \in [0, \mu]} \nu(p_1 H(x_1) + p_2 H(x_2)) = \max_{x_1 \in [0, \mu]} \nu \left( \frac{\sigma - \mu^2}{\sigma - 2\mu x_1 + x_1^2} H(x_1) + \frac{(\mu - x_1)^2}{\sigma - 2\mu x_1 + x_1^2} H \left( \frac{\sigma - \mu x_1}{\mu - x_1} \right) \right)$$

which is exactly  $\max_{x_1 \in [0, \mu]} W(x_1)$ .

Proof of 2: Let  $\mathbb{P}^{(k)} \sim (x_1^{(k)}, x_2^{(k)}, p_1^{(k)}, p_2^{(k)})$  be a feasible sequence with  $Z(\mathbb{P}^{(k)}) \rightarrow Z^*$ . Without loss of generality let  $x_1^{(k)} \leq x_2^{(k)}$ . Since  $p_1^{(k)} x_1^{(k)} + p_2^{(k)} x_2^{(k)} = \mu$ , we must have  $x_1^{(k)} \leq \mu$ . Then we must have a subsequence  $x_2^{(k_i)} \rightarrow \infty$ , since otherwise  $(x_1^{(k)}, x_2^{(k)}, p_1^{(k)}, p_2^{(k)})$  would lie in a compact set and there would exist a subsequence  $(x_1^{(k'_i)}, x_2^{(k'_i)}, p_1^{(k'_i)}, p_2^{(k'_i)}) \rightarrow (x_1^*, x_2^*, p_1^*, p_2^*)$ , where  $Z(\mathbb{P}^{(k'_i)}) = \nu \sum_{j=1}^2 p_j^{(k'_i)} H(x_j^{(k'_i)}) \rightarrow \nu \sum_{j=1}^2 p_j^* H(x_j^*)$  by the continuity of  $H$ , violating the non-existence of optimal solution. By  $p_1^{(k_i)} x_1^{(k_i)^2} + p_2^{(k_i)} x_2^{(k_i)^2} = \sigma$ , we have  $p_2^{(k_i)} = (\sigma - p_1^{(k_i)} x_1^{(k_i)^2}) / x_2^{(k_i)^2} \rightarrow 0$ , and  $p_2^{(k_i)} x_2^{(k_i)} = (\sigma - p_1^{(k_i)} x_1^{(k_i)^2}) / x_2^{(k_i)} \rightarrow 0$ . Thus  $p_1^{(k_i)} = 1 - p_2^{(k_i)} \rightarrow 1$  and  $x_1^{(k_i)} = (\mu - p_2^{(k_i)} x_2^{(k_i)}) / p_1^{(k_i)} \rightarrow \mu$ .

Therefore,

$$\begin{aligned} Z(\mathbb{P}^{(k_i)}) &= \nu \left( p_1^{(k_i)} H(x_1^{(k_i)}) + p_2^{(k_i)} H(x_2^{(k_i)}) \right) = \nu \left( p_1^{(k_i)} H(x_1^{(k_i)}) + \frac{\sigma - p_1^{(k_i)} x_1^{(k_i)^2}}{x_2^{(k_i)^2}} H(x_2^{(k_i)}) \right) \\ &\rightarrow \nu(H(\mu) + \lambda(\sigma - \mu^2)) \end{aligned}$$

Proof of 3: First, we show that  $W(x_1) \rightarrow \nu(H(\mu) + \lambda(\sigma - \mu^2))$  as  $x_1 \nearrow \mu$ . Consider the second term of  $W(x_1)$  given by

$$\lim_{x_1 \nearrow \mu} \frac{\nu(\mu - x_1)^2}{\sigma - 2\mu x_1 + x_2^2} H\left(\frac{\sigma - \mu x_1}{\mu - x_1}\right) = \lim_{x_1 \nearrow \mu} \frac{\nu(\sigma - \mu x_1)^2}{\sigma - 2\mu x_1 + x_2^2} \left(\frac{\mu - x_1}{\sigma - \mu x_1}\right)^2 H\left(\frac{\sigma - \mu x_1}{\mu - x_1}\right) = \nu\lambda(\sigma - \mu^2)$$

and the claim follows. Combining Parts 1 and 2 of this proposition, we must have  $Z^* = \max_{x_1 \in [0, \mu]} W(x_1)$ .  $\square$

### EC.3. Proofs for Section 6

We first show a result in parallel to Theorem 2 for the case of (11):

**THEOREM EC.7.** *Suppose  $h$  is bounded. Then the optimal value of (11) is the same as*

$$\begin{aligned} \max_{\mathbb{P}} \quad & \bar{\nu} \mathbb{E}[H(X)] \\ \text{subject to} \quad & \underline{\mu} \leq \mathbb{E}[X] \leq \bar{\mu} \\ & \underline{\sigma} \leq \mathbb{E}[X^2] \leq \bar{\sigma} \\ & \mathbb{P} \in \mathcal{P}^+ \end{aligned} \tag{EC.23}$$

Here the decision variable is a probability distribution  $\mathbb{P} \in \mathcal{P}^+$ , and  $\mathbb{E}[\cdot]$  is the corresponding expectation. Moreover, there is a one-to-one correspondence between the feasible solutions to (11) and (EC.23), given by  $f'_+(x+a) = \bar{\nu}(p(x)-1)$  for  $x \in \mathbb{R}^+$ , where  $f'_+$  is the right derivative of a feasible solution  $f$  of (11) such that  $f(x) = \int_a^x f'_+(t)dt + \eta$  for  $x \geq a$ , and  $p$  is a probability distribution function that is associated with a feasible probability measure over  $\mathbb{R}^+$  in (EC.23).

*Proof of Theorem EC.7.* Note that formulation (11) can be written as

$$\begin{aligned}
\max_{\underline{\beta} \leq \beta \leq \bar{\beta}, \underline{\eta} \leq \eta \leq \bar{\eta}} \max_f & \int_a^\infty h(x) f(x) dx \\
\text{subject to} & \int_a^\infty f(x) dx = \beta \\
& f(a) = f(a+) = \eta \\
& f'_+(a) \geq -\bar{\nu} \\
& f(x) \text{ convex for } x \geq a \\
& f(x) \geq 0 \text{ for } x \geq a
\end{aligned} \tag{EC.24}$$

The inner maximization is exactly (1), and thus by Theorem 2 we can reformulate (EC.24) as

$$\begin{aligned}
\max_{\underline{\beta} \leq \beta \leq \bar{\beta}, \underline{\eta} \leq \eta \leq \bar{\eta}} \max_{\mathbb{P}} & \bar{\nu} \mathbb{E}[H(X)] \\
\text{subject to} & \mathbb{E}[X] = \frac{\eta}{\bar{\nu}} \\
& \mathbb{E}[X^2] = \frac{2\beta}{\bar{\nu}} \\
& \mathbb{P} \in \mathcal{P}^+
\end{aligned}$$

which is equivalent to (EC.23). □

For convenience, we denote  $\widetilde{OPT}(\mathcal{D})$  as the program

$$\begin{aligned}
\max_{\mathbb{P}} & \bar{\nu} \mathbb{E}[H(X)] \\
\text{subject to} & \underline{\mu} \leq \mathbb{E}[X] \leq \bar{\mu} \\
& \underline{\sigma} \leq \mathbb{E}[X^2] \leq \bar{\sigma} \\
& \mathbb{P} \in \mathcal{D}
\end{aligned}$$

where  $\mathcal{D}$  is a collection of probability measures on  $\mathbb{R}$ . For example, (EC.23) can be written as  $\widetilde{OPT}(\mathcal{P}^+)$ . Let  $\tilde{Z}(\mathbb{P}) = \bar{\nu} \mathbb{E}[H(X)]$  be the objective function in  $\mathbb{P}$ .

PROPOSITION EC.2. *The optimal value of  $\widetilde{OPT}(\mathcal{P}^+)$  is identical to that of  $\widetilde{OPT}(\mathcal{P}_3^+)$ .*

*Proof of Proposition EC.2.* For  $\mathbb{P}$  feasible in  $\widetilde{OPT}(\mathcal{P}^+)$ , let  $\mu = \mathbb{E}[X]$  and  $\sigma = \mathbb{E}[X^2]$  be its first and second moments. By Theorem 3 there must exist  $\mathbb{P}' \in \mathcal{P}_3^+$  with the corresponding expectations  $\mathbb{E}'[X] = \mu$  and  $\mathbb{E}'[X^2] = \sigma$  such that  $\tilde{Z}(\mathbb{P}) \leq \tilde{Z}(\mathbb{P}')$ . Since  $\mathcal{P}_3^+ \subset \mathcal{P}^+$ , we conclude that the optimal value of  $\widetilde{OPT}(\mathcal{P}^+)$  is identical to that of  $\widetilde{OPT}(\mathcal{P}_3^+)$ .  $\square$

*Proof of Theorem 5.* Theorem 5 follows from Theorem EC.7 and Proposition EC.2, in the same way as the proof of Theorem 1.  $\square$

PROPOSITION EC.3. *Under Assumption 3,  $\widetilde{OPT}(\mathcal{P}^+)$  has the same optimal value as  $\widetilde{OPT}(\mathcal{P}_2^+)$ .*

*Proof of Proposition EC.3.* We know from Proposition EC.2 that  $\widetilde{OPT}(\mathcal{P}^+)$  has the same optimal value as  $\widetilde{OPT}(\mathcal{P}_3^+)$ . Any  $\mathbb{P}$  feasible for  $\widetilde{OPT}(\mathcal{P}_3^+)$  must necessarily have bounded support, say on  $[0, M]$ . By Lemma EC.2 there must exist  $\mathbb{P}' \in \mathcal{P}_2^+$ , with the same first and second moments as  $\mathbb{P}$ , such that  $\tilde{Z}(\mathbb{P}) \leq \tilde{Z}(\mathbb{P}')$ . Since  $\mathcal{P}_2^+ \subset \mathcal{P}_3^+$ , this implies that  $\widetilde{OPT}(\mathcal{P}_3^+)$  has the same optimal value as  $\widetilde{OPT}(\mathcal{P}_2^+)$ , which concludes the proposition.  $\square$

The following explains the origin of the two subproblems in (13):

LEMMA EC.3. *Under Assumption 1, and let  $\bar{\sigma} \geq \underline{\mu}^2$ . The optimal value of  $\widetilde{OPT}(\mathcal{P}_2^+)$  is given by  $\tilde{Z}^* = \max\{\tilde{Z}_1^*, \tilde{Z}_2^*\}$ , where  $\tilde{Z}_1^*$  is the optimal value of*

$$\begin{aligned} \max_{\mathbb{P}} \quad & \bar{v}\mathbb{E}[H(X)] \\ \text{subject to} \quad & \mathbb{E}[X] = \bar{\mu} \\ & \underline{\sigma} \leq \mathbb{E}[X^2] \leq \bar{\sigma} \\ & \mathbb{P} \in \mathcal{P}_2^+ \end{aligned} \tag{EC.25}$$

and  $\tilde{Z}_2^*$  is the optimal value of

$$\begin{aligned} \max_{\mathbb{P}} \quad & \bar{v}\mathbb{E}[H(X)] \\ \text{subject to} \quad & \underline{\mu} \leq \mathbb{E}[X] \leq \bar{\mu} \\ & \mathbb{E}[X^2] = \bar{\sigma} \\ & \mathbb{P} \in \mathcal{P}_2^+ \end{aligned} \tag{EC.26}$$

respectively.

*Proof of Lemma EC.3.* We argue that to solve  $\widetilde{OPT}(\mathcal{P}_2^+)$ , it suffices to restrict attention to the feasible region  $\{\mathbb{P} \in \mathcal{P}_2^+ : \mathbb{E}[X] = \bar{\mu}, \underline{\sigma} \leq \mathbb{E}[X^2] \leq \bar{\sigma}\} \cup \{\mathbb{P} \in \mathcal{P}_2^+ : \underline{\mu} \leq \mathbb{E}[X] \leq \bar{\mu}, \mathbb{E}[X^2] = \bar{\sigma}\}$ . Since  $h \geq 0$ ,  $\tilde{Z}^* \geq 0$ . There is nothing to prove if  $\tilde{Z}^* = 0$ . So suppose  $\tilde{Z}^* > 0$ . There exists  $\mathbb{P} \sim (x_1, x_2, p_1, p_2) \in \mathcal{P}_2^+$  with one of the  $x_i$ 's having  $H(x_i) > 0$  and  $p_i > 0$ . Now suppose  $\mathbb{P}$  satisfies  $\mathbb{E}[X] < \bar{\mu}$  and  $\mathbb{E}[X^2] < \bar{\sigma}$ . We can increase  $x_i$  so that  $\mathbb{E}[X] \leq \bar{\mu}$  and  $\mathbb{E}[X^2] \leq \bar{\sigma}$  remain satisfied, and  $\tilde{Z}^*(\mathbb{P})$  is at least as large as before since  $H(x)$  is non-decreasing. Hence any  $\mathbb{P}$  such that  $\mathbb{E}[X] < \bar{\mu}$  and  $\mathbb{E}[X^2] < \bar{\sigma}$  must have  $\tilde{Z}(\mathbb{P}) \leq \tilde{Z}(\mathbb{P}')$  for some  $\mathbb{P}' \in \{\mathbb{P} \in \mathcal{P}_2^+ : \mathbb{E}[X] = \bar{\mu}, \underline{\sigma} \leq \mathbb{E}[X^2] \leq \bar{\sigma}\} \cup \{\mathbb{P} \in \mathcal{P}_2^+ : \underline{\mu} \leq \mathbb{E}[X] \leq \bar{\mu}, \mathbb{E}[X^2] = \bar{\sigma}\}$ . This proves the lemma.  $\square$

*Proof of Theorem 6.* Lemma EC.3 allows one to consider only the programs (EC.25) and (EC.26) when solving  $\widetilde{OPT}(\mathcal{P}_2^+)$ . Theorem 6 then follows from Lemma 3, Theorem EC.7 and Proposition EC.3, using the same line of arguments in the proof of Theorem 4.  $\square$

## References

- Birge JR, Dulá JH (1991) Bounding separable recourse functions with limited distribution information. *Ann. Oper. Res.* 30(1):277–298.
- Rockafellar RT (1997) *Convex Analysis*. (Princeton University Press, Princeton, NJ).
- Winkler G (1988) Extreme points of moment sets. *Math. Oper. Res.* 13(4):581–587.
